# Supplementary material for: Data-Driven and Multiscale Modeling of DNA-Templated Dye Aggregates
Source: MDPI journal article supplement (doi:10.3390/molecules27113456), 2022-05-27
Supplement: s1 [file s1]

Table S1. Cartesian transition dipole moment ( $\mu$ ) vector components of dyes in implicit water solvent. Vertical excited state calculations were done using the ground state geometry. Dye structures are shown in Figure 4 of the main text.

| <b>Dye</b>      | <b><math>\mu_x</math> (Debye)</b> | <b><math>\mu_y</math> (Debye)</b> | <b><math>\mu_z</math> (Debye)</b> |
|-----------------|-----------------------------------|-----------------------------------|-----------------------------------|
| <b>Cy3</b>      | 12.25                             | 0.00                              | 0.00                              |
| <b>Cy5</b>      | 15.35                             | 0.00                              | 0.00                              |
| <b>Cy5-CN</b>   | 15.66                             | -0.24                             | 0.00                              |
| <b>Cy5-NMe2</b> | 15.81                             | -0.74                             | -0.01                             |
| <b>Cy5-Cl</b>   | -15.74                            | 0.00                              | 0.00                              |
| <b>Cy5-hex</b>  | 16.22                             | 0.00                              | 0.00                              |
| <b>Cy5-Peg</b>  | -16.19                            | 0.00                              | 0.00                              |
| <b>Cy5-tBu</b>  | -15.90                            | 0.00                              | 0.00                              |
| <b>Cy5.5</b>    | -15.57                            | 0.00                              | 0.00                              |
| <b>Cy7</b>      | 17.62                             | 0.00                              | 0.00                              |
| <b>1</b>        | 1.03                              | 8.98                              | 0.86                              |
| <b>2</b>        | -7.81                             | 0.43                              | -0.50                             |
| <b>3</b>        | -20.25                            | 0.00                              | 0.10                              |
| <b>4</b>        | 7.97                              | 0.42                              | -0.25                             |
| <b>5</b>        | -20.17                            | 0.00                              | 0.32                              |
| <b>6</b>        | 13.99                             | 0.21                              | 0.13                              |
| <b>7</b>        | 4.68                              | 9.57                              | 0.49                              |
| <b>8</b>        | -15.45                            | 1.08                              | 0.20                              |
| <b>9</b>        | -14.67                            | -0.46                             | 0.13                              |
| <b>10</b>       | 16.15                             | 1.02                              | 0.23                              |
| <b>11</b>       | -14.00                            | 0.30                              | -0.03                             |
| <b>12</b>       | -10.84                            | -2.63                             | 1.56                              |
| <b>13</b>       | -3.47                             | 7.98                              | -3.88                             |
| <b>14</b>       | 9.23                              | -1.43                             | 0.00                              |
| <b>15</b>       | 8.51                              | -6.10                             | -0.27                             |

Table S2. Gibbs free energy of solvation ( $\Delta G_{\text{solv}}$ ) of dyes in implicit water and n-octanol solvents. The values of  $\Delta G_{\text{solv}}$  were determined using Equation (2) with the dye geometry relaxed in implicit solvent and vacuum. Dye structures are shown in Figure 4 of the main text.

| Dye      | $\Delta G_{\text{solv}}^{\text{n-octanol}}$ (Hartree) | $\Delta G_{\text{solv}}^{\text{water}}$ (Hartree) |
|----------|-------------------------------------------------------|---------------------------------------------------|
| Cy3      | -0.0743                                               | -0.0655                                           |
| Cy5      | -0.0735                                               | -0.0626                                           |
| Cy5-CN   | -0.0831                                               | -0.0739                                           |
| Cy5-NMe2 | -0.0728                                               | -0.0618                                           |
| Cy5-Cl   | -0.0812                                               | -0.0690                                           |
| Cy5-hex  | -0.0806                                               | -0.0597                                           |
| Cy5-Peg  | -0.0966                                               | -0.0845                                           |
| Cy5-tBu  | -0.0734                                               | -0.0567                                           |
| Cy5.5    | -0.0785                                               | -0.0650                                           |
| Cy7      | -0.0740                                               | -0.0596                                           |
| 1        | -0.0329                                               | -0.0169                                           |
| 2        | -0.0845                                               | -0.0886                                           |
| 3        | -0.0738                                               | -0.0612                                           |
| 4        | -0.0251                                               | -0.0263                                           |
| 5        | -0.0757                                               | -0.0632                                           |
| 6        | -0.0737                                               | -0.0625                                           |
| 7        | -0.0344                                               | -0.0131                                           |
| 8        | -0.0780                                               | -0.0685                                           |
| 9        | -0.0479                                               | -0.0377                                           |
| 10       | -0.0745                                               | -0.0653                                           |
| 11       | -0.0715                                               | -0.0587                                           |
| 12       | -0.0478                                               | -0.0201                                           |
| 13       | -0.0431                                               | -0.0561                                           |
| 14       | -0.0260                                               | -0.0225                                           |
| 15       | -0.0433                                               | -0.0189                                           |
